## RESEARCH ARTICLE

# Genetic association analysis of the cardiovascular biomarker: N-terminal fragment of pro-B-type natriuretic peptide (NT-proBNP)

Yuan Yang<sup>1</sup>, Joseph M. Zmuda<sup>1,2</sup>, Mary K. Wojczynski<sup>3</sup>, Bharat Thyagarajan<sup>4</sup>, Kaare Christensen<sup>5</sup>, Ryan K. Cvejkus<sup>1</sup>, Allison L. Kuipers<sup>1\*</sup>

**1** Department of Epidemiology, University of Pittsburgh, Pittsburgh, PA, United States of America, **2** Department of Human Genetics, University of Pittsburgh, Pittsburgh, PA, United States of America, **3** Department of Genetics, Washington University in St Louis, St. Louis, MO, United States of America, **4** Department of Laboratory Medicine and Pathology, University of Minnesota, Minneapolis, MN, United States of America, **5** Department of Epidemiology, Biostatistics and Biodemography, Danish Aging Research Center, University of Southern Denmark, Odense C, Denmark

\* [kuipers@pitt.edu](mailto:kuipers@pitt.edu)

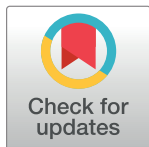

## OPEN ACCESS

**Citation:** Yang Y, Zmuda JM, Wojczynski MK, Thyagarajan B, Christensen K, Cvejkus RK, et al. (2021) Genetic association analysis of the cardiovascular biomarker: N-terminal fragment of pro-B-type natriuretic peptide (NT-proBNP). PLoS ONE 16(3): e0248726. <https://doi.org/10.1371/journal.pone.0248726>

**Editor:** Momiao Xiong, University of Texas School of Public Health, UNITED STATES

**Received:** November 5, 2020

**Accepted:** March 3, 2021

**Published:** March 15, 2021

**Copyright:** © 2021 Yang et al. This is an open access article distributed under the terms of the [Creative Commons Attribution License](https://creativecommons.org/licenses/by/4.0/), which permits unrestricted use, distribution, and reproduction in any medium, provided the original author and source are credited.

**Data Availability Statement:** The Institutional Review Boards at Boston University, Columbia University, and the University of Pittsburgh, and the Research Ethics Committee at the University of Southern Denmark have stated that only summary statistics can be shared with journals or the public without their review. Most of the data used for this analysis is available on the dbGAP database (accession phs000397.v2.p2), including the genetic, covariate, and outcome data. However, the ntBNP data is not available at dbGAP and must be

## Abstract

### Background

NT-proBNP is a biomarker of cardiovascular disease (CVD). Little is known about the heritability and genetic variants associated with NT-proBNP. Therefore, we estimated the heritability of and examined genetic associations of SNPs in the BNP gene region with circulating NT-proBNP and prevalent CVD in 4,331 participants from the Long Life Family Study (LLFS).

### Methods and results

Genotypes of 10 SNPs from the *NPPB* and *NPPA* regions that encode BNP and A-type natriuretic peptide, respectively, were tested for association with NT-proBNP and prevalent cardiovascular disease and risk factors. We performed analyses using the Sequential Oligogenic Linkage Analysis (SOLAR) program to account for family relatedness, and adjusted all models for age, sex, and field center. The mean age of the LLFS was 69.8 years (range 24–110) with 55.4% females. NT-proBNP was significantly heritable ( $h^2 = 0.21$ ;  $P = 4 \times 10^{-14}$ ), and the minor alleles of rs632793 ( $p < 0.001$ ) and rs41300100 ( $p = 0.05$ ) were independently associated with higher serum NT-proBNP levels. Additionally, the minor allele of rs632793 was significantly and consistently associated with lower prevalent CVD, including blood pressures, independent of NT-proBNP level (all  $P < 0.05$ ). Results for prevalent CVD, but not NT-proBNP levels, showed significant interaction by familial generation.

### Conclusion

In this family-based study of subjects with exceptional longevity, we identified several allelic variants in the BNP gene region associated with NT-pro-BNP levels and prevalent CVD.

requested from the LLFS data management coordinating center. Any interested parties may request BNP data by contacting Mike Province ([mprovince@wustl.edu](mailto:mprovince@wustl.edu)), Mary Wojczynski ([mwojczynski@wustl.edu](mailto:mwojczynski@wustl.edu)), and LeAnne Kniepkamp ([l.kniepkamp@wustl.edu](mailto:l.kniepkamp@wustl.edu)).

**Funding:** The LLFS was supported by the National Institute on Aging (U19AG063893, U01AG023712, U01AG023744, U01AG023746, U01AG023749, and U01AG023755). Dr. Kuipers was supported by grant K01HL125658 (PI: Kuipers) from the National Heart, Lung and Blood Institute. The funders had no role in study design, data collection and analysis, decision to publish, or preparation of the manuscript.

**Competing interests:** The authors have declared that no competing interests exist.

## Introduction

Cardiovascular disease (CVD) is the leading cause of death globally [1]. B-type natriuretic peptide (BNP) has been established as a diagnostic biomarker for heart failure (HF), a subset of CVD [2]. BNP has also been associated with established risk factors for CVD including hypertension [3], obesity [4] and diabetes [5]. The natriuretic peptide family consists of three peptides: atrial natriuretic peptide (ANP), brain natriuretic peptide (BNP), and C-type natriuretic peptide. BNP is released as a pro-hormone (proBNP), and proBNP comprises 108 amino acids, which can be cleaved into two parts: N-terminal fragment proBNP (AA residues 1–76; NT-proBNP), and C-terminal BNP (AA residues 77–108) [6]. NT-proBNP persists in the circulation longer, has a higher concentration in plasma, and is more stable in vitro compared to the full length or C-terminal BNP, which makes NT-proBNP a better clinical biomarker [7].

Cardiomyocyte stretch during abnormal intracardiac pressure is the primary stimulus for BNP expression [8]. As such, circulating BNP serves as a compensatory mechanism to offset the excessive vascular vasoconstriction when there is a decreased pumping capacity of the heart. NT-proBNP levels are used clinically to predict the risk of CVD, diagnose heart failure (HF), and to monitor the prognosis of other CVDs [3, 9, 10]. A diagnosis of HF can be ruled out if with age-specific low NT-proBNP levels in the non-acute setting, as established by the 2016 European Society of Cardiology guidelines [9]. Specifically, the normal range of NT-proBNP is <125pg/ml in individuals aged <75 years, and <450pg/ml in individuals aged ≥75years [11].

However, little is known about the genetic determinants of BNP with only a handful of studies evaluating its genetic regulation [12] and only a single study reporting its genetic heritability [13]. The study of heritability included 1,914 Framingham Heart Study participants from which they estimated the heritability of NT-proBNP to be 0.35 after adjustment for age, sex, and clinical variables [13]. Several single nucleotide polymorphisms (SNPs) in the *NPPB* gene region have been associated with NT-proBNP levels and CVD outcomes in population studies [14, 15] and clinical studies of patients with coronary artery disease [16].

In the current study, we aimed to replicate and extend results from a previous study conducted in the Atherosclerotic Risk in Communities (ARIC) cohort [15], of the association of prevalent CVD conditions with common genetic variation in the BNP gene region. Like previous studies, we focused on common, independent genetic variation in the *NPPA/NPPB* region, two genes that lie in close proximity to each other and encode for ANP and BNP, respectively. In addition, we expanded on previous findings from ARIC by conducting analyses in generally healthy adults from a unique set of families recruited for exceptional longevity, the Long Life Family Study (LLFS). Compared to ARIC, LLFS is older ( $69.8 \pm 15.5$  vs.  $54.3 \pm 6$ ) with a wider age range (24–110 vs. 45–64), and has a lower prevalence of hypertension. Therefore, not only is the LLFS a sample of individuals at low risk for their age of severe CVDs like HF, but the wide age range also allows for determination of how results may differ by age—a known strong correlate of NT-proBNP levels [17].

## Methods

### Population

The Long Life Family Study (LLFS) is a family-based multi-center cohort study that enrolled 4,953 predominantly European-ancestry participants between 2006 and 2009 from 539 families with exceptional longevity [18]. Participants were recruited at four study centers: Boston, MA (Boston University), New York, NY (Columbia University), Pittsburgh, PA (University of Pittsburgh), and Denmark (University of Southern Denmark). Potential probands in the US

who were at least 79 years old on January 1, 2005, and who had no end-stage renal disease or residence in hospice programs, were pre-screened for eligibility by telephone [18]. In Denmark, individuals who would be aged 90 and above during the study recruitment period were identified through the Danish National Register of Persons, which contains current information on names, addresses, place of birth, marriages, and vital status, and linked to archived parish registers to identify sibships. Eligibility at all centers was assessed by calculating a Family Longevity Selection Score (FLoSS), which was built from the birth date, gender, nation-specific cohort survival probabilities and the number of older living siblings [19]. A FLoSS score of 7 or higher was required for a family to be eligible as long as they also met the following criteria: the proband and at least one living sibling and one of their living offspring were willing to participate in the LLFS interview and provide a blood sample [18].

All baseline LLFS interviews and examinations were conducted in person with portable equipment. All research assistants conducting the exams were centrally trained and certified, and used standard protocols. Copies of all LLFS forms are provided with this manuscript as Supporting Information. The current analysis was done on a subset of 4,331 LLFS participants after excluding 622 participants who were missing serum NT-proBNP measures or measures under the assay detection limit of 5pg/ml ( $N = 335$ ) or was an outlier ( $BNP = 27950$ ,  $N = 1$ ), had current and/or a history of heart failure ( $N = 218$ ), and those with missing pedigree data ( $N = 68$ ). Written informed consent was obtained from each LLFS participant, and all study forms and protocols were approved by the Institutional Review Boards at Boston University, Columbia University, and the University of Pittsburgh, and by the Research Ethics Committee at the University of Southern Denmark.

### Measurement of NT-proBNP

Blood samples were collected after a  $\geq 6$ -hour fast and were shipped on ice within 48 hours to the LLFS central blood laboratory at the University of Minnesota for storage at  $-80^{\circ}\text{C}$  until assays were completed. Serum NT-proBNP was measured at baseline in the central laboratory by a Roche e411 Analyzer, which applies the sandwich immunoassay method to quantify NT-proBNP (Roche Diagnostics, Indianapolis, IN). The NT-proBNP inter-assay coefficient of variation (CV) was 2.7% at a mean concentration of 139.9 pg/mL and 5.1% at a mean concentration of 4,707.3 pg/mL.

### Genotyping

Genomic DNA was extracted from peripheral blood samples at the LLFS central blood laboratory at the University of Minnesota and shipped to the LLFS central genomics laboratory at the University of Washington St. Louis for genotyping. All genotype data from the LLFS were obtained from the Human Omni 2.5 v1 (Illumina, CA) genotyping chip, which was used on genomic DNA extracted from peripheral blood samples. In order to replicate previous studies and have enough power to detect associations with multiple comparisons, we focused on SNPs located within the genomic region spanning from the 5' end of *NPPA* through the 3' end of *NPPB*, which encode for ANP and BNP, respectively, and lie next to each other on chromosome 1. Both *NPPB* and *NPPA* regions were considered since there is evidence that these two genes share common regulatory sequences [20]. In total, 20 SNPs were directly genotyped in this region on the OMNI Chip. We excluded SNPs whose total number of heterozygotes + minor homozygotes was  $< 10$  ( $N = 5$ ) and selected 1 SNP at random for each set of SNPs with linkage disequilibrium ( $LD > 0.8$ ) ( $N = 5$  excluded; Fig 1). After these exclusions, 10 SNPs were selected for analysis. We coded the remaining SNPs as 0, 1, 2 based on the number of minor alleles. If the number of minor homozygous genotypes was  $< 10$ , then we combined

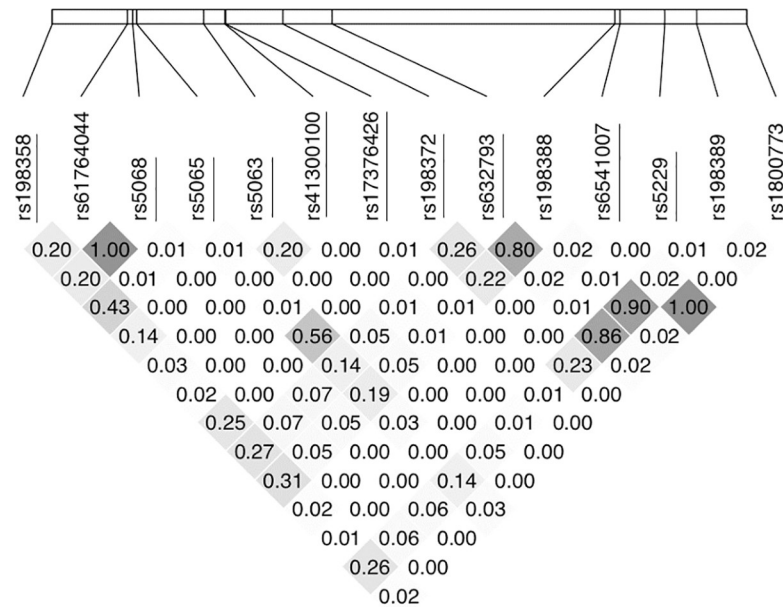

**Fig 1. Linkage disequilibrium in the NPPB/NPPA gene region in the LLFS.** Pairwise linkage disequilibrium (LD) in the LLFS was calculated and plotted using the *gaston* package in R for all genotyped SNPs in the BNP gene regions. R<sup>2</sup> values are shown and depicted using a heatmap function. Independent SNPs selected for this analysis are underlined.

<https://doi.org/10.1371/journal.pone.0248726.g001>

the minor homozygote genotype with the heterozygote genotype in order to increase power (N = 4; Table 1).

### Other measurements

Standing height was measured to the nearest 0.1 cm with a Handi-stat set square (Perspective Enterprises, Portage, MI) and the average of four measurements was used in analysis. Weight was measured to the nearest 0.1 kg with an electronic digital scale (SECA 841, Hanover, MD). Body mass index (BMI) was calculated from these measurements as weight (kg)/height (m)<sup>2</sup>. Centrally trained research assistants measured sitting blood pressure using the average of three

**Table 1. Description of genotyped SNPs in the NPPA/NPPB gene region.**

| SNP               | Chromosome 1 location (bp)* | Major/minor allele | Major homozygote n (%) | Heterozygote n (%) | Minor homozygote n (%) | Minor allele frequency | Model    |
|-------------------|-----------------------------|--------------------|------------------------|--------------------|------------------------|------------------------|----------|
| <u>rs198358</u>   | 11844019                    | A/G                | 2545 (59.4)            | 1500 (35.0)        | 243 (5.7)              | 0.23                   | Additive |
| <u>rs5068</u>     | 11845917                    | T/C                | 3843 (89.4)            | 440 (10.2)         | 15 (0.4)               | 0.05                   | Additive |
| <u>rs5065</u>     | 11846011                    | A/G                | 3187 (74.1)            | 996 (23.2)         | 117 (2.7)              | 0.14                   | Additive |
| <u>rs5063</u>     | 11847591                    | G/A                | 3906 (90.8)            | 382 (8.9)          | 12 (0.3)               | 0.05                   | Additive |
| <u>rs41300100</u> | 11848089                    | C/G                | 4218 (98.3)            | 74 (1.7)           | 1 (0.02)               | 0.01                   | Dominant |
| <u>rs17376426</u> | 11848110                    | C/T                | 3999 (93.0)            | 296 (6.9)          | 3 (0.1)                | 0.04                   | Dominant |
| <u>rs198372</u>   | 11849457                    | G/A                | 3166 (73.6)            | 1029 (24.0)        | 105 (2.4)              | 0.14                   | Additive |
| <u>rs632793</u>   | 11850620                    | A/G                | 1488 (34.6)            | 2082 (48.4)        | 728 (16.9)             | 0.41                   | Additive |
| <u>rs6541007</u>  | 11857407                    | G/A                | 4119 (95.8)            | 180 (4.2)          | 2 (0.05)               | 0.02                   | Dominant |
| <u>rs5229</u>     | 11858462                    | G/A                | 4179 (98.1)            | 82 (1.9)           | 0 (0.0)                | 0.01                   | Dominant |

\*sorted in 5' to 3' direction based on human genome GRCh38.p13.

<https://doi.org/10.1371/journal.pone.0248726.t001>

readings from an automated blood pressure machine (BP-tru BPM 300, VMS Medtech, Coquitlam, Canada). Hypertension was defined as SBP  $\geq$  130 mmHg or DBP  $\geq$  80 mmHg during the LLFS examination or current use of anti-hypertension medication [18]. Participant history of (atrial fibrillation) AF and myocardial infarction (MI) were determined by self-report during the interview process and included collection of information regarding treatment or hospitalization, if applicable.

### Statistical analysis

All analyses were performed using the Sequential Oligogenic Linkage Analysis (SOLAR) program, which applies a variance-covariance method to adjust for family structure [21]. We defined outliers for NT-proBNP as  $\pm$  4SD from the mean and excluded one observation (value = 27,950 pg/ml). We then log-transformed the NT-proBNP values to conform to the assumption of normal distribution as required by the SOLAR program. All analyses were adjusted for age, sex, and field center and used an alpha of 0.05 as a threshold for nominal significance, but also assessed Bonferroni-corrected alpha levels, as described below. Other potential risk factors for CVD, such as BMI, smoking, lipoprotein levels, and diabetes were considered to be potentially in the causal pathway and were not included as adjustment factors in order to not over-adjust the associations. We used multiple linear regressions to test the association of our selected SNPs (predictors) and logNT-proBNP (outcome), first as individual SNPs and then as SNPs combined into a single model in order to identify SNPs with independent associations with NT-proBNP (Bonferroni corrected alpha for 10 SNPs = 0.005).

We tested the association of SNPs that were associated with NT-proBNP level with individual CVD related measures and risk factors (Bonferroni corrected alpha for 7 SNPs = 0.007) including blood pressures, prevalent hypertension, BMI, history of AF, and history of MI. Lastly, for all significant models after Bonferroni correction, we ran additional analyses including adjustment for NT-proBNP level in order to determine if the significant genetic association was partially driven by NT-proBNP level itself. We also conducted sensitivity analyses among individuals of either generation who had NT-proBNP levels in the normal range defined as:  $<125$ pg/ml in those aged  $<75$  years, and  $<450$ pg/ml in individuals aged  $\geq 75$  years ( $N = 3,309$ ) [22]. Lastly, given the wide age range and global distribution of the LLFS, we also performed stratified analyses and tested for interaction by familial generation (proband generation and offspring generation) and country (US versus Denmark).

## Results

### Characteristics of LLFS population

The 4,331 participants from the LLFS in this analysis consisted of 55.4% females and were aged 69.8 years (24–110) on average (Table 2). Of the 4,331 participants, 1,385 were in the proband generation (49–110), while 2,946 were in the offspring generation (24–88). Approximately 6% of participants had a history of AF and 5% had a history of MI. The average systolic blood pressure (SBP) and diastolic blood pressure (DBP) were 131.8 mmHg and 77.5 mmHg, respectively. 55% percent of participants had hypertension and 80% were on anti-hypertensive therapy. The median level of NT-proBNP was 86 pg/ml. After adjusting for age, sex, and field center, the residual heritability of NT-proBNP was 0.21 ( $p = 4 \times 10^{-14}$ ).

### Associations of SNPs with NT-proBNP level

Genotype information for the 10 SNPs in the *NPPA/NPPB* region used in this analysis are listed in Table 1. Seven of these SNPs showed nominally significant associations with NT-

**Table 2. Basic characteristics of the LLFS by generation.**

| Characteristic                         | All LLFS         | Proband Generation | Offspring Generation |
|----------------------------------------|------------------|--------------------|----------------------|
| Total Participants                     | 4331             | 1385               | 2946                 |
| Age (mean $\pm$ SD)                    | 69.8 $\pm$ 15.5  | 89.2 $\pm$ 6.9     | 60.6 $\pm$ 8.3       |
| Female n (%)                           | 2398 (55.4)      | 755 (54.51)        | 1643 (55.8)          |
| Field Center n (%)                     | Denmark          | 1163 (26.9)        | 960 (32.6)           |
|                                        | Boston           | 1165 (26.9)        | 798 (27.1)           |
|                                        | New York         | 863 (19.9)         | 455 (15.4)           |
|                                        | Pittsburgh       | 1140 (26.3)        | 733 (24.9)           |
| BMI (kg/m <sup>2</sup> ) mean $\pm$ SD | 27.1 $\pm$ 4.8   | 26.1 $\pm$ 4.2     | 27.5 $\pm$ 4.9       |
| SBP (mmHg) mean $\pm$ SD               | 131.8 $\pm$ 22.2 | 139.2 $\pm$ 25.3   | 128.4 $\pm$ 19.7     |
| DBP (mmHg) mean $\pm$ SD               | 77.5 $\pm$ 11.4  | 74.0 $\pm$ 11.7    | 79.1 $\pm$ 10.9      |
| Hypertension n (%)                     | 3166 (73.1)      | 1189 (85.9)        | 1977 (67.1)          |
| Diabetes n (%)                         | 300 (6.9)        | 131 (9.5)          | 169 (5.7)            |
| Atrial Fibrillation n (%)              | 242 (5.6)        | 175 (12.7)         | 67 (2.3)             |
| Myocardial Infarction n (%)            | 213 (4.9)        | 129 (9.3)          | 84 (2.9)             |
| NT-proBNP (pg/ml) median (range)       | 86.0 (5–14739)   | 341 (5–14739)      | 54 (5–5310)          |

BMI: Body Mass Index, NT-proBNP: N-Terminal pro-BNP, SBP: Systolic Blood Pressure, DBP: Diastolic Blood Pressure.

<https://doi.org/10.1371/journal.pone.0248726.t002>

proBNP level (all  $P < 0.05$ ; Table 3). Entered together into a single model, these 7 SNPs accounted for 0.85% of the variance in NT-proBNP level. However, only 2 SNPs were independently associated with NT-proBNP level: rs632792 (additive  $\beta = 0.16$ ,  $p < 0.001$ ) and rs41300100 (dominant  $\beta = 0.26$ ,  $p = 0.05$ ; Table 3). On average, for each copy of the G allele at rs632793, individuals had 3.5% greater NT-proBNP than individuals with the AA genotype. Additionally, individuals with 1 or more A allele at rs41300100 had 5.7% greater NT-proBNP than those with the GG genotype.

**Table 3. Association between SNPs and NT-proBNP level.**

| SNPs       | Univariate |             | Independently Significant SNP |             |
|------------|------------|-------------|-------------------------------|-------------|
|            | $\beta$    | P-value     | $\beta$                       | P-value     |
| rs198358   | 0.11       | <0.001*     | -0.03                         | 0.43        |
| rs5068     | 0.12       | <b>0.01</b> | 0.06                          | 0.33        |
| rs5065     | 0.03       | 0.31        |                               |             |
| rs5063     | 0.24       | <0.001*     | 0.13                          | 0.06        |
| rs41300100 | 0.47       | <0.001*     | 0.26                          | <b>0.05</b> |
| rs17376426 | 0.12       | <b>0.04</b> | -0.09                         | 0.14        |
| rs198372   | 0.06       | <b>0.04</b> | -0.02                         | 0.6         |
| rs632793   | 0.17       | <0.001*     | 0.16                          | <0.001*     |
| rs6541007  | -0.05      | 0.55        |                               |             |
| rs5229     | -0.03      | 0.82        |                               |             |

NT-proBNP was modeled as the outcome and the SNPs were the predictors, adjusting for age, sex, study center. For Univariate results, each SNP was tested alone in a single model. Then SNPs that were significant in Univariate analyses were combined together into a single model to determine SNPs with independent effects on NT-proBNP level.

**BOLD** signifies  $P < 0.05$

\*denotes passing Bonferroni correction threshold.

<https://doi.org/10.1371/journal.pone.0248726.t003>

## Association of NT-proBNP with prevalent CVD measures

Associations between NT-proBNP level and CVD related measures are shown in [S1 Table](#). NT-proBNP level was positively associated with age ( $p = 1 \times 10^{-307}$ ), such that a 1 unit greater logNT-proBNP (~2.72 pg/ml) was associated with ~8 years greater age after adjusting for sex and study center. After adjusting for age and study center, 1 log(pg/ml) increased logNT-proBNP was associated with 20% greater odds of being male ( $P = 1 \times 10^{-17}$ ). After full adjustment for age, sex, and study center, 1 unit increased NT-proBNP was associated with 0.53 mmHg decreased diastolic blood pressure ( $p = 0.002$ ), 0.12 kg/m<sup>2</sup> decreased BMI, 45% decreased odds of having AF history, and 22% decreased odds of MI history (all  $P < 0.001$ ).

## Association of SNPs with prevalent CVD measures

Associations between the 7 SNPs individually associated with NT-proBNP levels and CVD measures are shown in [Table 4](#). The minor allele of rs632793 was nominally associated with AF, such that the presence of each G allele was associated with an additional 10% lower odds of a history of AF compared to individuals with the AA genotype ( $P = 0.030$ ). Also, the minor (G) allele of rs632793 was associated with lower SBP ( $\beta = -1.3$ ,  $p = 0.0095$ ) and DBP ( $\beta = -0.6$ ,  $p = 0.018$ ), but no significant association with prevalent hypertension when defined by blood pressures or medication status ( $p = 0.807$ ).

After further adjusting significant associations for NT-proBNP level, the association between the minor allele of rs632793 and AF was attenuated ( $\beta = -0.07$ ;  $p = 0.180$ ), while its association with lower SBP and DBP remained significant ( $P < 0.04$ ; [S5 Table](#)). In sensitivity analyses conducted only in individuals with NT-proBNP levels in the normal range ( $N = 3309$ ), the results were largely similar for all analyses ([S2–S4 Tables](#)).

## Stratified analyses

Compared to the proband generation, the offspring generation had a greater number of significant associations between SNPs and NT-proBNP level ([Table 5](#)). In addition to rs632793, rs17376426 was significantly and independently associated with NT-proBNP levels in the offspring generation. While there was significant interaction by generation for rs198358 and rs5065 (both  $P_{\text{interaction}} < 0.05$ ), the effect of rs632793 on levels of NT-proBNP was similar across generations ( $P_{\text{interaction}} = 0.09$ ). However, the associations of SNPs with CVD measures ([Table 6](#)) were predominantly seen in the proband generation, without any significant findings in the offspring who had less CVD burden in general ([Table 2](#)). Similar to results in all LLFS,

**Table 4. Association between CVD measures and SNPs associated with BNP level.**

| SNP        | BMI     |      | SBP     |             | DBP     |              | Hypertension |      | AF      |             | MI      |      |
|------------|---------|------|---------|-------------|---------|--------------|--------------|------|---------|-------------|---------|------|
|            | $\beta$ | P    | $\beta$ | P           | $\beta$ | P            | $\beta$      | P    | $\beta$ | P           | $\beta$ | P    |
| rs198358   | -0.04   | 0.15 | 0.14    | 0.8         | -0.04   | 0.9          | 0.03         | 0.39 | -0.09   | 0.09        | -0.02   | 0.7  |
| rs5068     | 0.02    | 0.64 | -1.05   | 0.32        | 0.21    | 0.7          | 0.04         | 0.53 | -0.14   | 0.18        | 0.02    | 1    |
| rs5063     | -0.06   | 0.27 | 0.36    | 0.75        | -0.9    | 0.13         | -0.01        | 0.9  | 0.05    | 0.69        | -0.1    | 0.37 |
| rs41300100 | 0.07    | 0.57 | -1.08   | 0.67        | -0.78   | 0.56         | -0.07        | 0.7  | -0.07   | 0.79        | 0.36    | 0.23 |
| rs17376426 | 0.04    | 0.54 | -0.22   | 0.87        | 0.93    | 0.17         | -0.01        | 0.88 | -0.01   | 0.93        | 0.02    | 0.98 |
| rs198372   | -0.03   | 0.44 | -0.64   | 0.34        | -0.4    | 0.25         | 0.03         | 0.55 | -0.01   | 0.89        | -0.03   | 0.69 |
| rs632793   | -0.02   | 0.36 | -1.25   | <b>0.01</b> | -0.59   | <b>0.018</b> | 0.01         | 0.81 | -0.11   | <b>0.03</b> | 0       | 0.89 |

Adjusted for age, sex, and study center.

**BOLD** signifies  $P < 0.05$ .

<https://doi.org/10.1371/journal.pone.0248726.t004>

Table 5. Association of BNP variants with NT-proBNP level stratified by LLFS generation.

| SNPs       | Proband Generation |         | Offspring Generation |         | Interaction |
|------------|--------------------|---------|----------------------|---------|-------------|
|            | $\beta$            | P-value | $\beta$              | P-value | P-value     |
| rs198358   | 0.006              | 0.9     | 0.16                 | <0.001  | 0.01        |
| rs5068     | 0.03               | 0.71    | 0.16                 | 0.003   | 0.25        |
| rs5065     | -0.08              | 0.15    | 0.08                 | 0.03    | 0.03        |
| rs5063     | 0.28               | 0.004   | 0.25                 | <0.001  | 0.84        |
| rs41300100 | 0.45               | 0.05    | 0.47                 | <0.001  | 0.85        |
| rs17376426 | 0.18               | 0.17    | -0.21                | 0.002*  | 0.08        |
| rs198372   | -0.03              | 0.64    | 0.09                 | 0.007   | 0.13        |
| rs632793   | 0.1                | 0.01*   | 0.19                 | <0.001* | 0.09        |
| rs6541007  | -0.06              | 0.7     | 0.04                 | 0.62    | 0.41        |
| rs5229     | -0.08              | 0.66    | -0.04                | 0.78    | 0.90        |

All models adjusted for age, sex, and study center.

\* Indicates SNPs with independent effects after combining SNPs with individual P-value<0.1 together into a single model.

<https://doi.org/10.1371/journal.pone.0248726.t005>

rs632793 was inversely associated with SBP and DBP, although the association with AF was not significant in either single generation subset (Table 6). These generation-specific effects for rs632793 are suggestive of a significant interaction by generation on blood pressures ( $P_{interaction} < 0.05$ ; S6 Table). Additionally, rs41300100 was significantly associated with hypertension ( $\beta = -4.06$ ,  $p = 0.006$ , Table 6) in the proband generation, alone; however this effect did not reflect significant interaction by generation (S6 Table).

Analyses stratified by study center (US versus Denmark) demonstrated similar population characteristics by country (S7 Table). Results were also consistent by country for the association of rs632793 and rs41300100 with NT-proBNP level (S8 Table) and showed no significant interaction effect by country on the association of BNP SNPs and CVD measures. However, the association between rs632793 and AF appears to be driven by families at the Danish study center (S8 Table).

Table 6. Association of BNP variants with CVD measures stratified by LLFS generation.

| NT-proBNP Associated SNP | BMI     |      | SBP     |        | DBP     |        | Hypertension |        | AF      |      | MI      |      |
|--------------------------|---------|------|---------|--------|---------|--------|--------------|--------|---------|------|---------|------|
|                          | $\beta$ | P    | $\beta$ | P      | $\beta$ | P      | $\beta$      | P      | $\beta$ | P    | $\beta$ | P    |
| <b>Proband</b>           |         |      |         |        |         |        |              |        |         |      |         |      |
| rs5063                   | -0.08   | 0.38 | 2.02    | 0.4    | -1.3    | 0.25   | -0.32        | 0.06   | -0.09   | 0.57 | -0.16   | 0.32 |
| rs41300100               | -0.13   | 0.56 | 0.64    | 0.91   | -0.46   | 0.86   | -4.06        | 0.006* | -0.23   | 0.49 | 0.42    | 0.34 |
| rs632793                 | 0.02    | 0.55 | -2.72   | 0.007* | -1.42   | 0.003* | -0.06        | 0.34   | -0.08   | 0.22 | 0.01    | 0.92 |
| <b>Offspring</b>         |         |      |         |        |         |        |              |        |         |      |         |      |
| rs198358                 | -0.05   | 0.1  | 0.78    | 0.19   | 0.31    | 0.36   | 0.04         | 0.35   | -0.14   | 0.11 | -0.06   | 0.48 |
| rs5068                   | 0.06    | 0.31 | -0.54   | 0.63   | 0.5     | 0.43   | 0.03         | 0.75   | -0.19   | 0.22 | -0.09   | 0.53 |
| rs5065                   | -0.06   | 0.12 | 1.01    | 0.15   | 0.31    | 0.43   | 0.01         | 0.87   | -0.17   | 0.08 | -0.01   | 0.89 |
| rs5063                   | -0.08   | 0.2  | 0.1     | 0.93   | -0.52   | 0.43   | 0.06         | 0.49   | 0.3     | 0.14 | -0.04   | 0.93 |
| rs41300100               | 0.14    | 0.34 | -0.62   | 0.82   | -0.57   | 0.71   | 0.05         | 0.78   | 0.22    | 0.6  | 0.33    | 0.46 |
| rs17376426               | 0.05    | 0.51 | -0.05   | 0.97   | 0.72    | 0.33   | -0.01        | 0.93   | 0.002   | 0.99 | -0.04   | 0.84 |
| rs198372                 | -0.04   | 0.33 | 0.06    | 0.93   | -0      | 0.99   | 0.03         | 0.6    | -0.11   | 0.29 | 0.04    | 0.72 |
| rs632793                 | -0.04   | 0.16 | -0.72   | 0.15   | -0.24   | 0.39   | 0.03         | 0.35   | -0.14   | 0.07 | 0.01    | 0.85 |

All models adjusted for age, sex, and study center.

\* Indicates an association that remained significant ( $P < 0.05$ ) after further adjustment for NT-proBNP level.

<https://doi.org/10.1371/journal.pone.0248726.t006>



## Discussion

We found that, in the LLFS, NT-proBNP was significantly heritable (residual heritability estimate ( $H^2_r$ ) = 0.21) and that there were 7 SNPs in the *NPPA/NPPB* region associated with NT-proBNP level. The minor alleles of rs632793 and rs41300100 were independently associated with higher NT-proBNP level. Additionally, NT-proBNP was positively associated with age and male sex, but negatively associated with BMI, blood pressure, AF, and MI. The minor allele of rs632793 was inversely associated with SBP, DBP, and a history of AF. The significant association of SNPs with blood pressures was independent of NT-proBNP level, which may suggest that not all of the genetic association was explained by NT-proBNP level, though longitudinal analyses would be needed to determine this for certain. Lastly, results with prevalent CVDs also showed an interaction with age group (i.e., generation); thereby, highlighting the age-related differences in BNP function.

These results are consistent with previous findings that NT-proBNP is heritable (previous evidence  $H^2_r = 0.34$ ) [13] and that common SNPs in the *NPPA/NPPB* region are associated with circulating NT-proBNP level [15, 16, 23, 24]. Our results are also similar to previous studies showing that NT-proBNP is positively associated with age [25] and inversely associated with BMI [26]. We identified rs632793 as the most significant and consistent genetic variant associated with NT-proBNP level in the total LLFS, as well as, in the proband generation alone. This is in line with previous studies [14, 16, 27, 28], although, some other studies focused specifically and solely on rs198389 [15, 16, 24, 29–31]. These two variants are in strong LD in our study (Fig 1) and; thus, likely represent the same underlying genetic signal.

The somewhat counterintuitive association between SNPs in this region being associated with higher circulating NT-proBNP levels, but lower risk of cardiovascular conditions and risk factors even though higher NT-proBNP is associated with increased CVD risk, is consistent with previous reports [14, 16, 32–34]. The physiologic function of BNP is to relieve the heart of excess stress by reducing vasoconstriction [8, 35], so it plays a protective role in early life. But in the presence or progression of cardiac disease, the body is required to up-regulate the expression of BNP in order to attempt to relieve the symptoms of disease [15] and which is in line with associations we saw between NT-proBNP level and CVD risk factors in the current study (S1 Table). This is why greater circulating BNP is indicative of disease and can be used as a clinical marker of HF diagnosis or progression. Interestingly, our interaction analyses showed that the genetic associations did not significantly differ by generation (i.e. aging) for NT-proBNP level, but did for blood pressure and hypertension. This also supports the hypothesis that the counterintuitive direction of effect is not driven by genetic effects, but rather by the body's regulation of NT-proBNP levels in relation to progression of cardiovascular disease.

The goal of the current study was to replicate and extend findings on BNP genetics and CVD that exist in the literature. However, it is unique to previous reports in that our families largely consist of exceptionally healthy, older adults with a low burden of CVD for their age compared to previous studies in high-risk groups. In the LLFS, we found that rs632793 which was associated with greater NT-proBNP level, was also associated with lower prevalence of cardiovascular conditions and risk factors. This relationship demonstrates the physiologic protective role of BNP across age groups and even in generally healthy adults, which suggests the relationships are not driven by a predisposition to a high risk of CVD. This idea is even more clear from the sensitivity analyses in individuals with normal NT-proBNP levels, which showed similar results to the whole LLFS cohort. This observation warrants further study of the clinical utility for CVD risk prediction of NT-proBNP in low-risk populations.

The results of the current study identified SNPs that have previously been reported to be associated with NT-proBNP and/or CVD: primarily rs632793 (in LD with rs198389), but also

rs41300100 and rs17376426. While the function of rs632793 is not known, it is located in the 5' flanking promoter region and is predicted to be associated with transcription regulation [36]. Also, rs198389 (in LD with rs632793) is located in an upstream regulatory region of *NPPB* and the minor (G) allele has been shown to be associated with 1.8-fold higher *NPPB* promoter activity [32]. rs198389 has been associated with higher NT-proBNP and BNP levels [12, 15, 16, 23, 24, 32–34, 37], lower blood pressure and hypertension [15] and a reduced rate of cardiovascular readmission [16].

In addition to rs632793, rs41300100 was associated with NT-proBNP level in all LLFS and hypertension in the proband generation, and rs17376426 was associated with NT-proBNP level independent of rs632793 in the offspring generation. rs41300100 is located in the 5 prime UTR of *NPPA*, and is predicted to lie in an enhancer region [38]. However, this particular SNP is not in LD with any other SNP in the region in the LLFS (Fig 1) and has not been reported to be associated with any traits to date. rs17376426 is located at 2KB upstream transcript variant and is predicted as a regulatory variant [39]. Therefore, the potential functional impact of rs41300100 and rs17376426 on NT-proBNP levels and/or function is unknown, and may warrant further investigation.

This study has several strengths. First, the LLFS provided a wide age range of adults to test the genetic association of BNP and is the first study to conduct these analyses in exceptionally long-lived individuals at low-risk for CVD. While the exceptional longevity and healthier than age-matched individuals of the LLFS may make it seem like it is not generalizable, there is still substantial chronic disease prevalence and a wide variation in all measures of health within the cohort [18]. Additionally, the family study design of LLFS allowed us to calculate the heritability of NT-proBNP and is only the second study to do so. There was also a reasonably large sample size ( $N = 4,331$ ) for a candidate gene approach and we used the most reliable assay for NT-proBNP measurement. We also assessed our primary results using both a nominal ( $P \leq 0.05$ ) and Bonferroni-corrected P-value threshold given our strong *a priori* hypotheses and limited scope of work. Lastly, we looked at multiple SNPs across the *NPPA/NPPB* region instead of only a single candidate SNP, as many previous reports of rs198389 have done [15, 23, 24, 33, 40, 41]. This approach allowed for the identification of a number of SNPs in addition to rs198389 with significant associations to either NT-proBNP or CVD, that would have otherwise been missed.

However, there are a number of additional considerations. We do not yet have longitudinal data on NT-proBNP or incident cardiovascular disease risk in the LLFS; however, as the study continues follow-up, we will be able to assess these in the future. As age is a strong, non-linear determinant of NT-proBNP level, the inclusion of a wide-range of ages may have attenuated our associations between genetic variants and NT-proBNP given the variation in risk prediction by CVD status. However, our sensitivity analyses in individuals with normal NT-proBNP levels attempted to minimize the influence of prevalent cardiac disease. Besides, we limited our study to SNPs in the *NPPA/NPPB* region on chromosome 1. We did this in order to look at the association of genetic variation around BNP with circulating BNP levels and only looked at common SNPs in order to minimize the number of tests. However, SNPs in other regions, such as rs11105306 located on chromosome 12 and rs13107352 located on chromosome 4, have also been shown to be associated with the circulating NT-proBNP levels [30], which we did not assess in the current study. In addition, there are a number of factors that were not included in our analyses as they were considered to potentially be a part of the causal pathway between BNP and CVD, including BMI, smoking, lipids, and diabetes. However, it is likely that these factors are involved in the reported relationships. Lastly, while we did not include a replication cohort, we started with an *a priori* hypothesis to do a candidate gene association

study and our results were in-line with previous reports; thus, our study serves as replication to this previous work.

We found that NT-proBNP level is significantly heritable in a cohort of families with exceptional aging: the LLFS. We also identified rs632793, rs41300100, and rs17376426 to be independently associated with NT-proBNP levels and related prevalent CVD conditions and risk factors. We showed that alleles associated with greater NT-proBNP were also associated with a lower prevalence of CVD conditions and risk factors, even though high NT-proBNP levels are used clinically to indicate heart failure. This seemingly counterintuitive result is consistent with previous reports and highlights the complex relationship and negative feedback loop of the BNP protein and cardiovascular conditions. As such, future research may benefit from taking into consideration genetic determinants when evaluating clinical use of BNP in the aging population.

## Supporting information

**S1 Table. Associations between NT-proBNP level and CVD measures.**

(DOCX)

**S2 Table. Association between SNPs and NT-proBNP level in individuals with normal NP-proBNP level.**

(DOCX)

**S3 Table. Association between significant SNPs and CVD measures in individuals with normal NP-proBNP level.**

(DOCX)

**S4 Table. Association between significant SNPs and CVD measures in individuals with normal NP-proBNP level further adjusted for NT-proBNP level.**

(DOCX)

**S5 Table. Association between significant SNPs and CVD measures further adjusted for NT-proBNP level.**

(DOCX)

**S6 Table. Effect of the interaction between significant SNP and LLFS generation on CVD measures.**

(DOCX)

**S7 Table. Basic characteristics of the LLFS by study center country.**

(DOCX)

**S8 Table. Association of significant BNP variants with CVD measures stratified by study center country.**

(DOCX)

**S1 File. Supporting information file containing all study questionnaires.**

(PDF)

## Author Contributions

**Conceptualization:** Yuan Yang, Allison L. Kuipers.

**Data curation:** Mary K. Wojczynski, Bharat Thyagarajan, Ryan K. Cvejkus, Allison L. Kuipers.

**Formal analysis:** Yuan Yang, Ryan K. Cvejkus, Allison L. Kuipers.

**Funding acquisition:** Joseph M. Zmuda, Bharat Thyagarajan, Kaare Christensen.

**Methodology:** Joseph M. Zmuda, Mary K. Wojczynski, Bharat Thyagarajan, Allison L. Kuipers.

**Project administration:** Joseph M. Zmuda.

**Supervision:** Allison L. Kuipers.

**Writing – original draft:** Yuan Yang, Allison L. Kuipers.

**Writing – review & editing:** Yuan Yang, Joseph M. Zmuda, Mary K. Wojczynski, Bharat Thyagarajan, Kaare Christensen, Ryan K. Cvejkus, Allison L. Kuipers.

## References

1. Roth GA, Johnson C, Abajobir A, Abd-Allah F, Abera SF, Abyu G, et al. Global, Regional, and National Burden of Cardiovascular Diseases for 10 Causes, 1990 to 2015. *Journal of the American College of Cardiology*. 2017; 70(1):1–25. Epub 2017/05/22. <https://doi.org/10.1016/j.jacc.2017.04.052> PMID: 28527533; PubMed Central PMCID: PMC5491406.
2. Writing Committee M, Yancy CW, Jessup M, Bozkurt B, Butler J, Casey DE Jr., et al. 2013 ACCF/AHA guideline for the management of heart failure: a report of the American College of Cardiology Foundation/American Heart Association Task Force on practice guidelines. *Circulation*. 2013; 128(16):e240–327. Epub 2013/06/07. <https://doi.org/10.1161/CIR.0b013e31829e8776> PMID: 23741058.
3. Bower JK, Lazo M, Matsushita K, Rubin J, Hoogeveen RC, Ballantyne CM, et al. N-Terminal Pro-Brain Natriuretic Peptide (NT-proBNP) and Risk of Hypertension in the Atherosclerosis Risk in Communities (ARIC) Study. *American journal of hypertension*. 2015; 28(10):1262–6. Epub 2015/03/19. <https://doi.org/10.1093/ajh/hpv026> PMID: 25783741; PubMed Central PMCID: PMC4580540.
4. Khan AM, Cheng S, Magnusson M, Larson MG, Newton-Cheh C, McCabe EL, et al. Cardiac natriuretic peptides, obesity, and insulin resistance: evidence from two community-based studies. *The Journal of clinical endocrinology and metabolism*. 2011; 96(10):3242–9. Epub 2011/08/19. <https://doi.org/10.1210/jc.2011-1182> PMID: 21849523; PubMed Central PMCID: PMC3200240.
5. Sanchez OA, Duprez DA, Bahrami H, Peralta CA, Daniels LB, Lima JA, et al. Changes in N-terminal pro-B-type natriuretic peptide and incidence of diabetes: The Multi-Ethnic Study of Atherosclerosis (MESA). *Diabetes Metab*. 2015; 41(5):378–86. Epub 2015/06/07. <https://doi.org/10.1016/j.diabet.2015.04.005> PMID: 26047677; PubMed Central PMCID: PMC4795828.
6. Goetze JP. B-type natriuretic peptide: from posttranslational processing to clinical measurement. *Clin Chem*. 2012; 58(1):83–91. Epub 2011/12/01. <https://doi.org/10.1373/clinchem.2011.165696> PMID: 22126935.
7. Clerico A, Vittorini S, Passino C. Measurement of the pro-hormone of brain type natriuretic peptide (proBNP): methodological considerations and pathophysiological relevance. *Clin Chem Lab Med*. 2011; 49(12):1949–54. Epub 2011/08/27. <https://doi.org/10.1515/CCLM.2011.686> PMID: 21867450.
8. Richards AM. N-Terminal B-type Natriuretic Peptide in Heart Failure. *Heart Fail Clin*. 2018; 14(1):27–39. Epub 2017/11/21. <https://doi.org/10.1016/j.hfc.2017.08.004> PMID: 29153198.
9. Ponikowski P, Voors AA, Anker SD, Bueno H, Cleland JGF, Coats AJS, et al. 2016 ESC Guidelines for the diagnosis and treatment of acute and chronic heart failure: The Task Force for the diagnosis and treatment of acute and chronic heart failure of the European Society of Cardiology (ESC) Developed with the special contribution of the Heart Failure Association (HFA) of the ESC. *Eur Heart J*. 2016; 37(27):2129–200. Epub 2016/05/22. <https://doi.org/10.1093/eurheartj/ehw128> PMID: 27206819.
10. Fuster V, Ryden LE, Cannom DS, Crijns HJ, Curtis AB, Ellenbogen KA, et al. ACC/AHA/ESC 2006 Guidelines for the Management of Patients with Atrial Fibrillation: a report of the American College of Cardiology/American Heart Association Task Force on Practice Guidelines and the European Society of Cardiology Committee for Practice Guidelines (Writing Committee to Revise the 2001 Guidelines for the Management of Patients With Atrial Fibrillation): developed in collaboration with the European Heart Rhythm Association and the Heart Rhythm Society. *Circulation*. 2006; 114(7):e257–354. Epub 2006/08/16. <https://doi.org/10.1161/CIRCULATIONAHA.106.177292> PMID: 16908781.
11. McCullough PA, Kluger AY. Interpreting the Wide Range of NT-proBNP Concentrations in Clinical Decision Making. *Journal of the American College of Cardiology*. 2018; 71(11):1201–3. Epub 2018/03/17. <https://doi.org/10.1016/j.jacc.2018.01.056> PMID: 29544602.

12. Lanfear DE, Stolker JM, Marsh S, Rich MW, McLeod HL. Genetic variation in the B-type natriuretic peptide pathway affects BNP levels. *Cardiovasc Drugs Ther.* 2007; 21(1):55–62. Epub 2007/03/07. <https://doi.org/10.1007/s10557-007-6007-5> PMID: 17340039.
13. Wang TJ, Larson MG, Levy D, Benjamin EJ, Corey D, Leip EP, et al. Heritability and genetic linkage of plasma natriuretic peptide levels. *Circulation.* 2003; 108(1):13–6. Epub 2003/06/25. <https://doi.org/10.1161/01.CIR.0000081657.83724.A7> PMID: 12821537.
14. Newton-Cheh C, Larson MG, Vasani RS, Levy D, Bloch KD, Surti A, et al. Association of common variants in NPPA and NPPB with circulating natriuretic peptides and blood pressure. *Nat Genet.* 2009; 41(3):348–53. Epub 2009/02/17. <https://doi.org/10.1038/ng.328> PMID: 19219041; PubMed Central PMCID: PMC2664511.
15. Seidemann SB, Vardeny O, Claggett B, Yu B, Shah AM, Ballantyne CM, et al. An NPPB Promoter Polymorphism Associated With Elevated N-Terminal pro-B-Type Natriuretic Peptide and Lower Blood Pressure, Hypertension, and Mortality. *Journal of the American Heart Association.* 2017; 6(4). Epub 2017/03/28. <https://doi.org/10.1161/jaha.116.005257> PMID: 28341776; PubMed Central PMCID: PMC5533018.
16. Ellis KL, Newton-Cheh C, Wang TJ, Frampton CM, Doughty RN, Whalley GA, et al. Association of genetic variation in the natriuretic peptide system with cardiovascular outcomes. *Journal of molecular and cellular cardiology.* 2011; 50(4):695–701. Epub 2011/02/01. <https://doi.org/10.1016/j.yjmcc.2011.01.010> PMID: 21276798.
17. Kragelund C, Grønning B, Køber L, Hildebrandt P, Steffensen R. N-Terminal Pro-B-Type Natriuretic Peptide and Long-Term Mortality in Stable Coronary Heart Disease. *New England Journal of Medicine.* 2005; 352(7). <https://doi.org/10.1056/NEJMoa042330> PMID: 15716560
18. Newman AB, Glynn NW, Taylor CA, Sebastiani P, Perls TT, Mayeux R, et al. Health and function of participants in the Long Life Family Study: A comparison with other cohorts. *Aging (Albany NY).* 2011; 3(1):63–76. Epub 2011/01/25. <https://doi.org/10.18632/aging.100242> PMID: 21258136; PubMed Central PMCID: PMC3047140.
19. Sebastiani P, Hadley EC, Province M, Christensen K, Rossi W, Perls TT, et al. A family longevity selection score: ranking sibships by their longevity, size, and availability for study. *American journal of epidemiology.* 2009; 170(12):1555–62. Epub 2009/11/17. <https://doi.org/10.1093/aje/kwp309> PMID: 19910380; PubMed Central PMCID: PMC2800272.
20. Man J, Barnett P, Christoffels VM. Structure and function of the Nppa-Nppb cluster locus during heart development and disease. *Cell Mol Life Sci.* 2018; 75(8):1435–44. Epub 2018/01/06. <https://doi.org/10.1007/s00018-017-2737-0> PMID: 29302701; PubMed Central PMCID: PMC5852170.
21. Almasy L, Blangero J. Multipoint quantitative-trait linkage analysis in general pedigrees. *Am J Hum Genet.* 1998; 62(5):1198–211. Epub 1998/05/23. S0002-9297(07)61542-0 [pii] <https://doi.org/10.1086/301844> PMID: 9545414.
22. Gustafsson F, Steensgaard-Hansen F, Badskaer J, Poulsen AH, Corell P, Hildebrandt P. Diagnostic and prognostic performance of N-terminal proBNP in primary care patients with suspected heart failure. *Journal of cardiac failure.* 2005; 11(5 Suppl):S15–20. Epub 2005/06/11. <https://doi.org/10.1016/j.cardfail.2005.04.022> PMID: 15948095.
23. Costello-Boerrigter LC, Boerrigter G, Ameenuddin S, Mahoney DW, Slusser JP, Heublein DM, et al. The effect of the brain-type natriuretic peptide single-nucleotide polymorphism rs198389 on test characteristics of common assays. *Mayo Clin Proc.* 2011; 86(3):210–8. Epub 2011/03/03. <https://doi.org/10.4065/mcp.2010.0708> PMID: 21364112; PubMed Central PMCID: PMC3046941.
24. Lajer M, Tarnow L, Jorsal A, Parving HH. Polymorphisms in the B-type natriuretic peptide (BNP) gene are associated with NT-proBNP levels but not with diabetic nephropathy or mortality in type 1 diabetic patients. *Nephrology, dialysis, transplantation: official publication of the European Dialysis and Transplant Association—European Renal Association.* 2007; 22(11):3235–9. Epub 2007/06/15. <https://doi.org/10.1093/ndt/gfm360> PMID: 17567649.
25. Redfield MM, Rodeheffer RJ, Jacobsen SJ, Mahoney DW, Bailey KR, Burnett JC Jr., Plasma brain natriuretic peptide concentration: impact of age and gender. *Journal of the American College of Cardiology.* 2002; 40(5):976–82. Epub 2002/09/13. [https://doi.org/10.1016/s0735-1097\(02\)02059-4](https://doi.org/10.1016/s0735-1097(02)02059-4) PMID: 12225726.
26. Park SJ, Cho KI, Jung SJ, Choi SW, Choi JW, Lee DW, et al. N-terminal pro-B-type natriuretic Peptide in overweight and obese patients with and without diabetes: an analysis based on body mass index and left ventricular geometry. *Korean Circ J.* 2009; 39(12):538–44. Epub 2010/01/06. <https://doi.org/10.4070/kcj.2009.39.12.538> PMID: 20049140; PubMed Central PMCID: PMC2801462.
27. Del Greco MF, Pattaro C, Luchner A, Pichler I, Winkler T, Hicks AA, et al. Genome-wide association analysis and fine mapping of NT-proBNP level provide novel insight into the role of the MTHFR-CLCN6-NPPA-NPPB gene cluster. *Hum Mol Genet.* 2011; 20(8):1660–71. Epub 2011/01/29. <https://doi.org/10.1093/hmg/ddr035> PMID: 21273288; PubMed Central PMCID: PMC3063986.

28. Wu Z, Xu M, Sheng H, Lou Y, Su X, Chen Y, et al. Association of natriuretic peptide polymorphisms with left ventricular dysfunction in southern Han Chinese coronary artery disease patients. *Int J Clin Exp Pathol*. 2014; 7(10):7148–57. Epub 2014/11/18. PMID: [25400811](https://pubmed.ncbi.nlm.nih.gov/25400811/); PubMed Central PMCID: PMC4230134.
29. Jin G, Chen Z, Zhang J, Song J, Shi J, Zhou B. Association of brain natriuretic peptide gene polymorphisms with chronic obstructive pulmonary disease complicated with pulmonary hypertension and its mechanism. *Biosci Rep*. 2018; 38(5). Epub 2018/09/16. <https://doi.org/10.1042/BSR20180905> PMID: [30217946](https://pubmed.ncbi.nlm.nih.gov/30217946/); PubMed Central PMCID: PMC6167498.
30. Johansson A, Eriksson N, Lindholm D, Varenhorst C, James S, Syvanen AC, et al. Genome-wide association and Mendelian randomization study of NT-proBNP in patients with acute coronary syndrome. *Hum Mol Genet*. 2016; 25(7):1447–56. Epub 2016/02/26. <https://doi.org/10.1093/hmg/ddw012> PMID: [26908625](https://pubmed.ncbi.nlm.nih.gov/26908625/).
31. Poręba R, Początek K, Gać P, Poręba M, Gonerska M, Jonkisz A, et al. SNP rs198389 (T-381 C) polymorphism in the B-type natriuretic peptide gene promoter in patients with atherosclerotic renovascular hypertension. *Polish Archives of Internal Medicine*. 2009; 119(4):219–24. <https://doi.org/10.20452/pamw.658> PMID: [19413180](https://pubmed.ncbi.nlm.nih.gov/19413180/)
32. Meirhaeghe A, Sandhu MS, McCarthy MI, de Groot P, Cotel D, Arveiler D, et al. Association between the T-381C polymorphism of the brain natriuretic peptide gene and risk of type 2 diabetes in human populations. *Hum Mol Genet*. 2007; 16(11):1343–50. Epub 2007/04/07. <https://doi.org/10.1093/hmg/ddm084> PMID: [17412758](https://pubmed.ncbi.nlm.nih.gov/17412758/).
33. Pfister R, Sharp S, Luben R, Welsh P, Barroso I, Salomaa V, et al. Mendelian randomization study of B-type natriuretic peptide and type 2 diabetes: evidence of causal association from population studies. *PLoS medicine*. 2011; 8(10):e1001112. Epub 2011/11/01. <https://doi.org/10.1371/journal.pmed.1001112> PMID: [22039354](https://pubmed.ncbi.nlm.nih.gov/22039354/); PubMed Central PMCID: PMC3201934.
34. Musani SK, Fox ER, Kraja A, Bidulescu A, Lieb W, Lin H, et al. Genome-wide association analysis of plasma B-type natriuretic peptide in blacks: the Jackson Heart Study. *Circulation Cardiovascular genetics*. 2015; 8(1):122–30. Epub 2015/01/07. <https://doi.org/10.1161/CIRCGENETICS.114.000900> PMID: [25561047](https://pubmed.ncbi.nlm.nih.gov/25561047/); PubMed Central PMCID: PMC4426827.
35. Luchner A, Stevens TL, Borgeson DD, Redfield M, Wei CM, Porter JG, et al. Differential atrial and ventricular expression of myocardial BNP during evolution of heart failure. *Am J Physiol*. 1998; 274(5):H1684–9. Epub 1998/06/05. <https://doi.org/10.1152/ajpheart.1998.274.5.H1684> PMID: [9612380](https://pubmed.ncbi.nlm.nih.gov/9612380/).
36. Budoff MJ, Nasir K, Mao S, Tseng PH, Chau A, Liu ST, et al. Ethnic differences of the presence and severity of coronary atherosclerosis. *Atherosclerosis*. 2006; 187(2):343–50. Epub 2005/10/26. S0021-9150(05)00600-3 [pii] <https://doi.org/10.1016/j.atherosclerosis.2005.09.013> PMID: [16246347](https://pubmed.ncbi.nlm.nih.gov/16246347/).
37. Takeishi Y, Toriyama S, Takabatake N, Shibata Y, Konta T, Emi M, et al. Linkage disequilibrium analyses of natriuretic peptide precursor B locus reveal risk haplotype conferring high plasma BNP levels. *Biochemical and biophysical research communications*. 2007; 362(2):480–4. Epub 2007/08/28. <https://doi.org/10.1016/j.bbrc.2007.08.028> PMID: [17719005](https://pubmed.ncbi.nlm.nih.gov/17719005/).
38. Register TC, Hruska KA, Divers J, Bowden DW, Palmer ND, Carr JJ, et al. Plasma Dickkopf1 (DKK1) Concentrations Negatively Associate with Atherosclerotic Calcified Plaque in African-Americans with Type 2 Diabetes. *The Journal of clinical endocrinology and metabolism*. 2013. Epub 2012/11/06. jc.2012-3038 [pii] <https://doi.org/10.1210/jc.2012-3038> PMID: [23125289](https://pubmed.ncbi.nlm.nih.gov/23125289/).
39. Claes KJ, Viaene L, Heye S, Meijers B, d'Haese P, Evenepoel P. Sclerostin: Another vascular calcification inhibitor? *The Journal of clinical endocrinology and metabolism*. 2013; 98(8):3221–8. Epub 2013/06/22. <https://doi.org/10.1210/jc.2013-1521> PMID: [23788689](https://pubmed.ncbi.nlm.nih.gov/23788689/).
40. Choquet H, Cavalcanti-Proenca C, Lecoeur C, Dina C, Cauchi S, Vaxillaire M, et al. The T-381C SNP in BNP gene may be modestly associated with type 2 diabetes: an updated meta-analysis in 49 279 subjects. *Hum Mol Genet*. 2009; 18(13):2495–501. Epub 2009/04/21. <https://doi.org/10.1093/hmg/ddp169> PMID: [19377085](https://pubmed.ncbi.nlm.nih.gov/19377085/).
41. Meroufel DN, Ouhaibi-Djellouli H, Mediène-Benchekeur S, Hermant X, Grenier-Boley B, Lardjam-Hetraf SA, et al. Examination of the brain natriuretic peptide rs198389 single-nucleotide polymorphism on type 2 diabetes mellitus and related phenotypes in an Algerian population. *Gene*. 2015; 567(2):159–63. Epub 2015/05/03. <https://doi.org/10.1016/j.gene.2015.04.073> PMID: [25934190](https://pubmed.ncbi.nlm.nih.gov/25934190/).
